# Supplementary material for: Photoassisted synthesis of manganese oxide nanostructures using visible light at room temperature
Source: Royal Society of Chemistry journal article supplement (doi:10.1039/c3gc40487k), 2013-01-01
Supplement: c3gc40487k.pdf [file c3gc40487k.pdf]

## Visible light assisted synthesis of manganese oxide nanoparticles at room temperature

Lavinia Balan\*, Camelia Matei Ghimbeu, Loïc Vidal, Cathie Vix-Guterl

*Institut de Science des Matériaux de Mulhouse (IS2M) - LRC CNRS 7228, 15 rue Jean Starcky - BP 2488, 68057 Mulhouse, France*

*Réseau sur le Stockage Electrochimique de l'Energie (RS2E), FR CNRS 3459, France*

\*- Corresponding author

Email: [lavinia.balan@uha.fr](mailto:lavinia.balan@uha.fr);

Tel: 33389608844;

The Raman spectra realized on the synthesized  $\lambda$ -MnO<sub>2</sub> was compared to the bulk  $\lambda$ -MnO<sub>2</sub>. It can be observed that the same peaks are detected which confirms that the synthesized oxide is indeed  $\lambda$ -MnO<sub>2</sub>. In addition, it can be noticed that the main peak of the synthesized material is broader and shifted to the higher frequencies due certainly to the nanometric size of the particles.

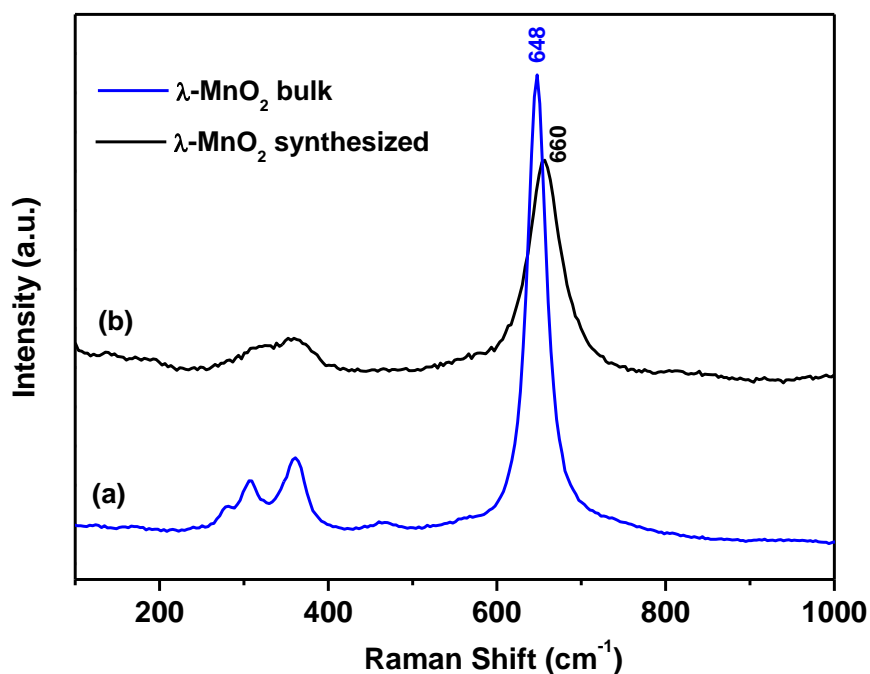

*Fig. S1: Raman spectra of (a)  $\lambda$ -MnO<sub>2</sub> bulk and (b)  $\lambda$ -MnO<sub>2</sub> synthesized by VIS irradiation in the presence of NaOH*

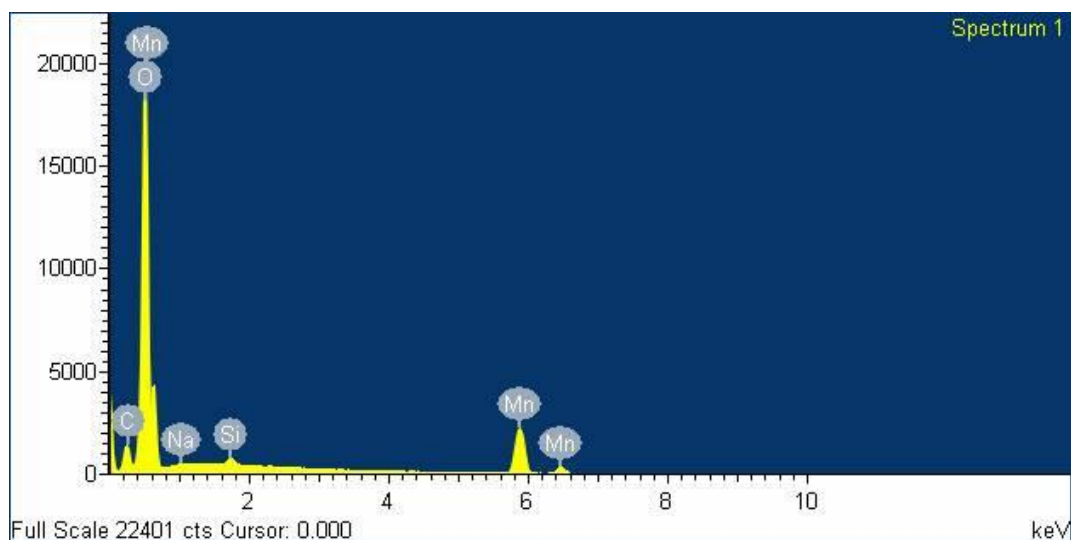

Fig. S2: EDX spectra of a manganese oxide obtained by irradiation in the presence of NaOH

Table S1: Composition of manganese oxide determined by EDX

| Element | Mn   | O    | Na   | *C  | *Si  |
|---------|------|------|------|-----|------|
| wt. %   | 63.4 | 31.6 | 0.15 | 4.2 | 0.53 |

\*The C and Si are coming from the substrate used to perform the EDX analysis

Figure S3a and b shows the morphology of manganese oxide obtained using manganese nitrate and manganese chloride in air. In the first case, a mixture of nanoparticles ( $\gamma$ - $\text{Mn}_3\text{O}_4$ ) and nanotubes ( $\lambda$ - $\text{MnO}_2$ ) is obtained while the second case only nanoparticles of  $\gamma$ - $\text{Mn}_3\text{O}_4$  are formed. It is clear that a counter anion which not contains oxygen, hence a reaction medium poorer in oxygen, favors the formation of oxides with lower oxidation state. This supports also the results obtained with manganese nitrate but in a nitrogen richer medium when the same morphology and crystalline phase was obtained (Fig. S3c).

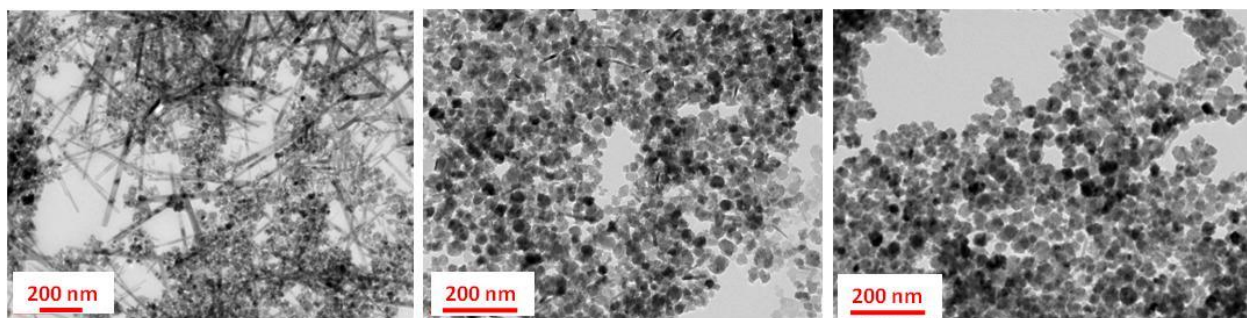

Fig. S3: TEM pictures of manganese oxides prepared by using (a) manganese nitrate-air (b)manganese chloride-air and (c)manganese nitrate-1h-rich  $N_2$  air atmospheres. (irradiation time 1h, in the LiOH presence)

Figure S4 shows the UV-Vis absorption spectra of  $Mn(NO_3)_2$  0.1M in aqueous solution, that exhibits an absorption band located in the 260-340 nm range (Fig. S4a). Upon addition of hydroxide (NaOH 4.8 mM) in the precursor solution, a new absorption appears on the whole visible range. It corresponds to Rayleigh scattering by submicrometric particles with the characteristic  $1/\lambda^4$  wavelength dependence range (Fig S4b). It is due to new species (clusters) formed upon addition of hydroxide. After a 1h irradiation of this suspension, an autophotocatalytic process takes place, thus inducing an important increase of the amount of particles that goes in line with a huge increase of the apparent absorption due to light scattering (Fig S4c).

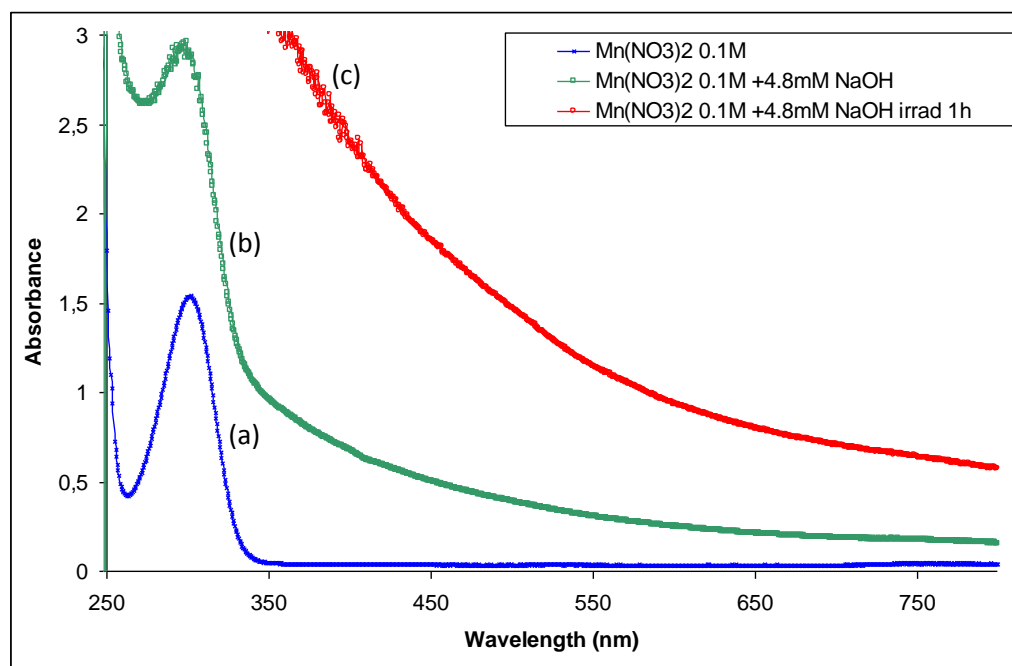

*Fig. S4: UV-Visible absorption spectra of  $Mn(NO_3)_2$  solution (a)  $Mn(NO_3)_2$  with 4.8mM NaOH (b) and  $Mn(NO_3)_2$  with 4.8mM NaOH after 1h irradiation.*

The influence of the irradiation time (1h, 3h and respectively 24h) on the manganese oxide morphology and structure was evaluated for the LiOH systems. The TEM pictures (Fig. S5) show no significant morphology difference when varying this parameter but structural modifications are clearly see by XRD and Raman spectroscopy (Fig. S6).

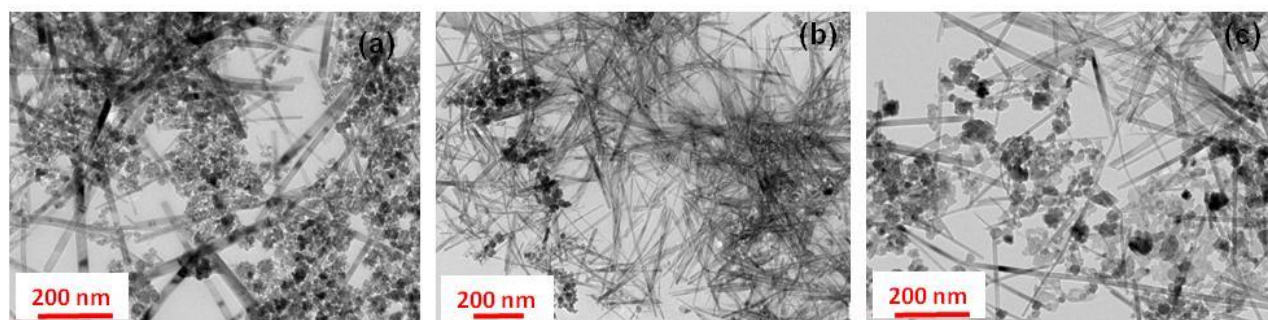

*Fig.S5: TEM pictures of manganese oxides prepared using of LiOH and different irradiation time exposure: (a) 1h (b) 3h and (c) 24h;*

The Raman spectra of the manganese oxides synthesized at 1h, 3h and 24h irradiation times are presented in Fig. S6. After 1h of irradiation the obtained manganese oxide is a mixture of  $\gamma$ - $Mn_3O_4$  and  $\lambda$ - $MnO_2$  phases. When the irradiation time increases to 3h the most intense peak ( $660\text{ cm}^{-1}$ ) significantly decrease and after 24 h irradiations specific peaks corresponding to a mixture  $\gamma$ - $Mn_3O_4$ ,  $\lambda$ - $MnO_2$  and  $MnOOH$  are seen.

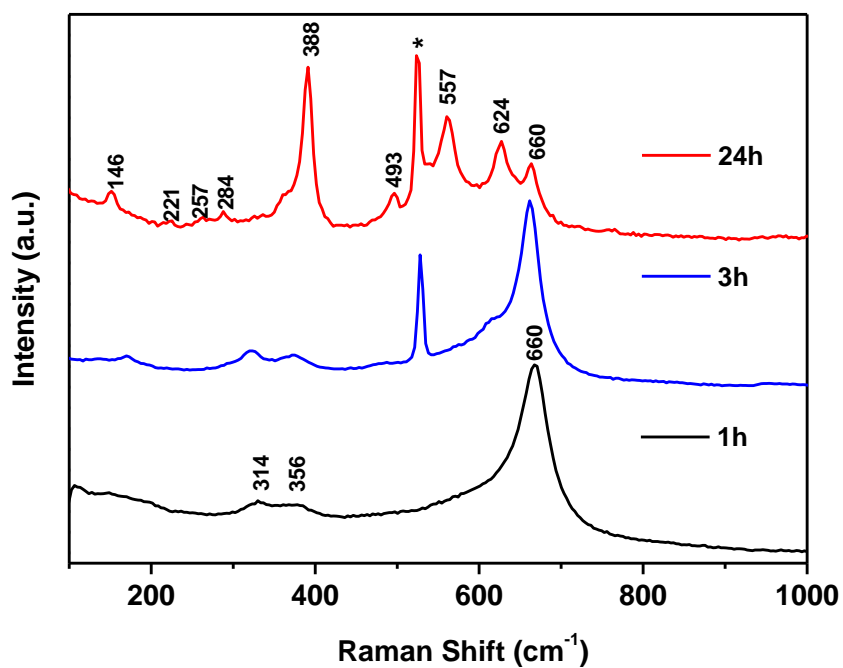

Fig.S6: Raman spectra of manganese oxides prepared using of LiOH and different irradiation time exposure: (a) 1h (b) 3h and (c) 24h;

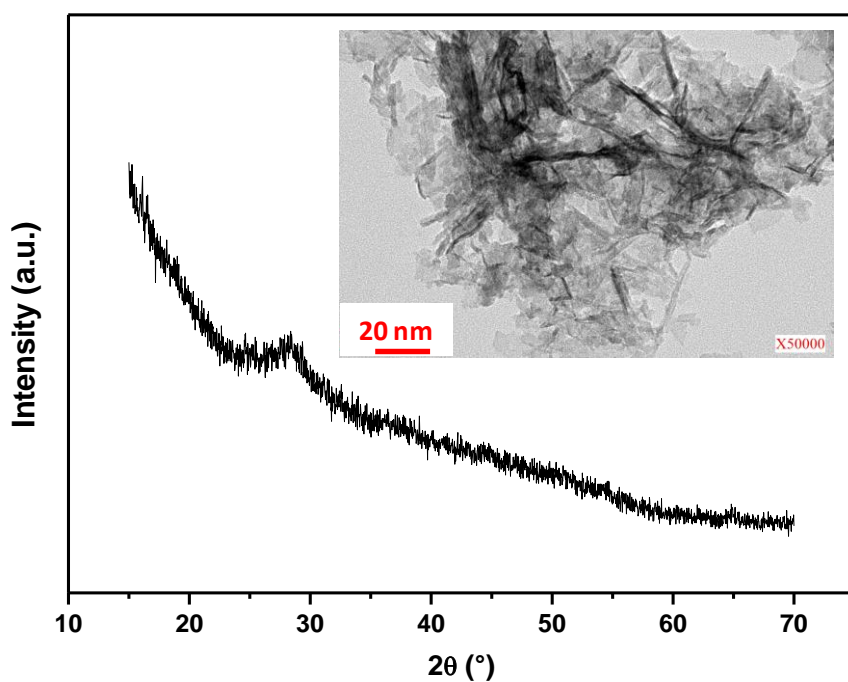

Fig. S7: XRD patterns and TEM image of a material obtained in the presence of LiOH under pure  $\text{N}_2$  atmosphere (1h irradiation)

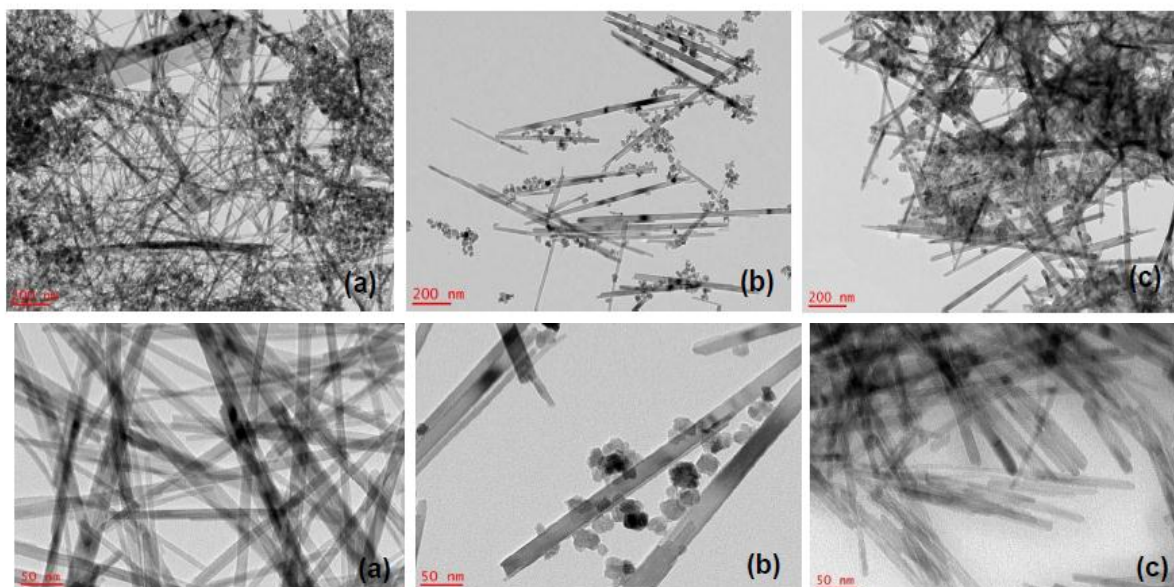

Fig. S8: TEM pictures of manganese oxides prepared with different precursor solution concentration: (a) 0.1 M (b) 0.4 M and (c) 0.8 M in the presence of LiOH;

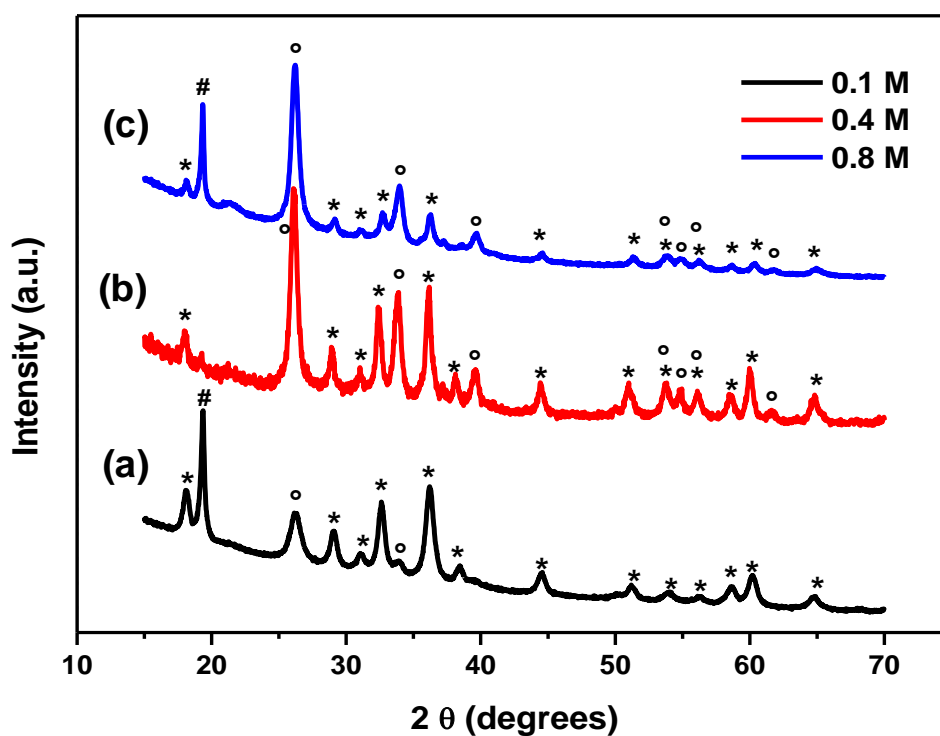

Fig. S9: XRD patterns of manganese oxides prepared with different precursor solution concentration: (a) 0.1 M (b) 0.4 M and (c) 0.8 M in the presence of LiOH;

Table S2: Synthesis parameters used along with the formed products and their characteristics

| No. | Precursor                                            | Hydroxide | [Mn <sup>2+</sup> ]<br>(mol/L) | [HO <sup>-</sup> ]<br>(mmol/L) | Time<br>(hours) | Atmosphere         | Phase                                                                 | Morphology      | Size<br>(nm)                     |
|-----|------------------------------------------------------|-----------|--------------------------------|--------------------------------|-----------------|--------------------|-----------------------------------------------------------------------|-----------------|----------------------------------|
| 1   | Mn(NO <sub>3</sub> ) <sub>2</sub> •4H <sub>2</sub> O | NaOH      | 0.1                            | 4.8                            | 24              | air                | γ-Mn <sub>3</sub> O <sub>4</sub>                                      | Spheres         | 6-8                              |
| 2   | Mn(NO <sub>3</sub> ) <sub>2</sub> •4H <sub>2</sub> O | NaOH      | 0.4                            | 4.8                            | 24              | air                | λ-MnO <sub>2</sub>                                                    | Rods            | L:50-150<br>D: 2-5               |
| 3   | Mn(NO <sub>3</sub> ) <sub>2</sub> •4H <sub>2</sub> O | NaOH      | 0.8                            | 4.8                            | 24              | air                | λ-MnO <sub>2</sub>                                                    | Rods            | L:50-100<br>D:5-7                |
| 4   | Mn(NO <sub>3</sub> ) <sub>2</sub> •4H <sub>2</sub> O | LiOH      | 0.1                            | 4.8                            | 24              | air                | λ-MnO <sub>2</sub> +<br>γ-Mn <sub>3</sub> O <sub>4</sub> +<br>MnO(OH) | Flowers<br>Rods | 30<br>L:1500-2500<br>D: 10       |
| 5   | Mn(NO <sub>3</sub> ) <sub>2</sub> •4H <sub>2</sub> O | LiOH      | 0.4                            | 4.8                            | 24              | air                | λ-MnO <sub>2</sub> +<br>γ-Mn <sub>3</sub> O <sub>4</sub> +<br>MnO(OH) | Flowers<br>Rods | 30-40<br>L:1000-1200<br>D: 10-15 |
| 6   | Mn(NO <sub>3</sub> ) <sub>2</sub> •4H <sub>2</sub> O | LiOH      | 0.8                            | 4.8                            | 24              | air                | λ-MnO <sub>2</sub> +<br>γ-Mn <sub>3</sub> O <sub>4</sub> +<br>MnO(OH) | Flowers<br>Rods | 30<br>L:800-1000<br>D: 7-10      |
| 7   | Mn(NO <sub>3</sub> ) <sub>2</sub> •4H <sub>2</sub> O | LiOH      | 0.4                            | 2.4                            | 24              | air                | λ-MnO <sub>2</sub>                                                    | Rods            | L: 200-300<br>D:2-5              |
| 8   | Mn(NO <sub>3</sub> ) <sub>2</sub> •4H <sub>2</sub> O | LiOH      | 0.4                            | 7.8                            | 24              | air                | λ-MnO <sub>2</sub> +<br>γ-Mn <sub>3</sub> O <sub>4</sub> +<br>MnO(OH) | Cubes<br>Rods   | 30<br>L:1000-1500<br>D:15-25     |
| 9   | Mn(NO <sub>3</sub> ) <sub>2</sub> •4H <sub>2</sub> O | LiOH      | 0.4                            | 4.8                            | 1               | air                | λ-MnO <sub>2</sub> +<br>γ-Mn <sub>3</sub> O <sub>4</sub>              | Rods<br>Flowers | L:300-500<br>D:20<br>D:40        |
| 10  | Mn(NO <sub>3</sub> ) <sub>2</sub> •4H <sub>2</sub> O | LiOH      | 0.4                            | 4.8                            | 3               | air                | λ-MnO <sub>2</sub> +<br>γ-Mn <sub>3</sub> O <sub>4</sub> +<br>MnO(OH) | Flowers<br>Rods | 30-40<br>L:1000-1200<br>D: 10-15 |
| 11  | Mn(NO <sub>3</sub> ) <sub>2</sub> •4H <sub>2</sub> O | LiOH      | 0.4                            | 4.8                            | 1               | O <sub>2</sub>     | λ-MnO <sub>2</sub>                                                    | Rods            | L:50-100<br>D:5-7                |
| 12  | Mn(NO <sub>3</sub> ) <sub>2</sub> •4H <sub>2</sub> O | LiOH      | 0.4                            | 4.8                            | 1               | Air-N <sub>2</sub> | γ-Mn <sub>3</sub> O <sub>4</sub>                                      | Flowers         | 40                               |
| 13  | Mn(NO <sub>3</sub> ) <sub>2</sub> •4H <sub>2</sub> O | LiOH      | 0.4                            | 4.8                            | 1               | N <sub>2</sub>     | -                                                                     | -               | -                                |
| 14  | Mn(NO <sub>3</sub> ) <sub>2</sub> •4H <sub>2</sub> O | KOH       | 0.4                            | 4.8                            | 24              | air                | λ-MnO <sub>2</sub>                                                    | Rods            | 50-150                           |
| 15  | MnCl <sub>2</sub>                                    | LiOH      | 0.4                            | 4.8                            | 1               | air                | γ-Mn <sub>3</sub> O <sub>4</sub>                                      | Cubes           | 20-25                            |
